# Supplementary material for: Unraveling the Pharmacological Potential of Lichen Extracts in the Context of Cancer and Inflammation With a Broad Screening Approach
Source: PubMed Central journal article supplement (PMC7509413; doi:10.3389/fphar.2020.01322), 2020-09-04
Supplement: DataSheet_4.pdf [file DataSheet_4.pdf]

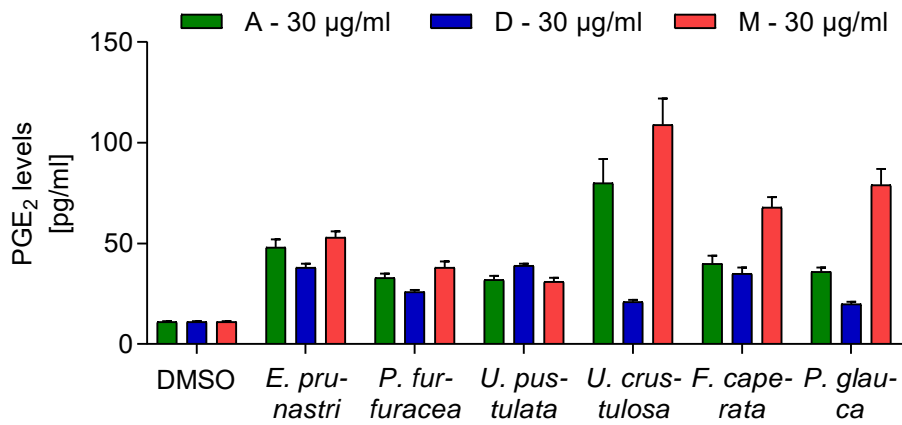

#### Supplemental Figure 4

For the PGE<sub>2</sub> assay, RAW macrophages were incubated with the indicated concentrations of lichen extracts dissolved in organic solvent (A, D, M) or DMSO (vehicle) over 24h. From the supernatant the concentration of PGE<sub>2</sub> was determined by ELISA. Data are expressed as mean  $\pm$  SEM. n=1.
